# Supplementary material for: TSNAD: an integrated software for cancer somatic mutation and tumour-specific neoantigen detection
Source: PubMed Central journal article supplement (PMC5414268; doi:10.1098/rsos.170050), 2017-04-05
Supplement: rsos170050supp1.pdf [file rsos170050supp1.pdf]

# Royal Society Open Science

## Supplementary Material

### **TSNAD: an Integrated Software for Cancer Somatic Mutation and Tumor-Specific NeoAntigen Detection**

Zhan Zhou<sup>1, †</sup>, Xingzheng Lyu<sup>2, †</sup>, Jingcheng Wu<sup>1</sup>, Xiaoyue Yang<sup>1</sup>, Shanshan Wu<sup>1</sup>, Jie Zhou<sup>1</sup>, Xun Gu<sup>3</sup>, Zhixi Su<sup>4,\*</sup>, Shuqing Chen<sup>1,\*</sup>

<sup>1</sup>Zhejiang Provincial Key Laboratory of Anti-Cancer Drug Research, College of Pharmaceutical Sciences, Zhejiang University, Hangzhou 310058, China

<sup>2</sup>College of Computer Science and Technology, Zhejiang University, Hangzhou 310013, China

<sup>3</sup>Department of Genetics, Development and Cell Biology, Program of Bioinformatics and Computational Biology, Iowa State University, Ames, IA 50010, USA

<sup>4</sup>State Key Laboratory of Genetic Engineering and MOE Key Laboratory of Contemporary Anthropology, School of Life Sciences, Fudan University, Shanghai 200438, China

<sup>†</sup>These authors have contributed equally to this work

\*To whom correspondence should be addressed: Zhixi Su: [zxsu@fudan.edu.cn](mailto:zxsu@fudan.edu.cn) and Shuqing Chen: [chenshuqing@zju.edu.cn](mailto:chenshuqing@zju.edu.cn)

**Supplementary Table S1.** The distribution of mutation with the same recurrences in membrane proteins

| Mutation recurrences | Number of mutations |
|----------------------|---------------------|
| 1                    | 79198               |
| 2                    | 6859                |
| 3                    | 1412                |
| 4                    | 492                 |
| 5                    | 180                 |
| 6                    | 87                  |
| 7                    | 55                  |
| 8                    | 25                  |
| 9                    | 17                  |
| 10                   | 9                   |
| 11                   | 7                   |
| 12                   | 3                   |
| 13                   | 1                   |
| 14                   | 1                   |
| 15                   | 3                   |
| 16                   | 1                   |
| 18                   | 1                   |
| 23                   | 1                   |
| 25                   | 1                   |
| 44                   | 1                   |

**Supplementary Table S2.** The distribution of mutation with the same recurrences in MHC prediction results.

| Mutation recurrences | Number of mutations |
|----------------------|---------------------|
| 1                    | 1311238             |
| 2                    | 87322               |
| 3                    | 14228               |
| 4                    | 4063                |
| 5                    | 1665                |
| 6                    | 792                 |
| 7                    | 530                 |
| 8                    | 234                 |
| 9                    | 173                 |
| 10                   | 137                 |
| 11                   | 103                 |
| 12                   | 57                  |
| 13                   | 29                  |
| 14                   | 29                  |
| 15                   | 42                  |
| 16                   | 10                  |
| 17                   | 13                  |
| 18                   | 11                  |
| 19                   | 5                   |
| 20                   | 6                   |
| 21                   | 5                   |
| 22                   | 16                  |
| 23                   | 5                   |
| 25                   | 7                   |
| 26                   | 4                   |
| 27                   | 14                  |
| 29                   | 2                   |
| 32                   | 1                   |
| 35                   | 3                   |
| 38                   | 11                  |
| 44                   | 1                   |
| 57                   | 5                   |
| 100                  | 4                   |
| 102                  | 1                   |
| 106                  | 7                   |
| 112                  | 1                   |
| 182                  | 2                   |
| 200                  | 3                   |
| 239                  | 5                   |
| 322                  | 1                   |

**Supplementary Table S3.** The 65 potential common neoantigens whose corresponding mutations appear in at least 20 out of the 9,155 donors from the ICGC database and had the IC50 less than 500.

| Name   | HLA_allele  | Position | Neoantigen  | Mutation | Affinity(nM) | Recurrences |
|--------|-------------|----------|-------------|----------|--------------|-------------|
| TP53   | HLA-A*24:02 | 9        | NWRPILTI    | R248W    | 461          | 57          |
| TP53   | HLA-B*35:01 | 2        | MCNSSCMGSM  | G245S    | 391          | 38          |
| TP53   | HLA-A*11:01 | 2        | GLAPPQHLTR  | I195T    | 380          | 22          |
| TP53   | HLA-A*02:01 | 7        | GMNWRPILTI  | R248W    | 350          | 57          |
| TP53   | HLA-B*35:01 | 1        | YMCNSSCMGSM | G245S    | 338          | 38          |
| TP53   | HLA-A*02:01 | 7        | GMNWRPILTI  | R248W    | 332          | 57          |
| TP53   | HLA-C*03:04 | 1        | YMCNSSCMGSM | G245S    | 85           | 38          |
| TP53   | HLA-C*03:03 | 1        | YMCNSSCMGSM | G245S    | 85           | 38          |
| SF3B1  | HLA-B*40:01 | 9        | QEVRTISALAI | K700E    | 52           | 100         |
| SF3B1  | HLA-B*40:01 | 9        | QEVRTISAL   | K700E    | 16           | 100         |
| PTEN   | HLA-A*02:01 | 9        | GQTGVMICAYL | R130Q    | 499          | 29          |
| PTEN   | HLA-C*03:04 | 5        | KAGKGGTGVM  | R130G    | 442          | 26          |
| PTEN   | HLA-C*03:03 | 5        | KAGKGGTGVM  | R130G    | 442          | 26          |
| PIK3CA | HLA-C*03:04 | 2        | FMKQMNDAL   | H1047L   | 489          | 27          |
| PIK3CA | HLA-C*03:03 | 2        | FMKQMNDAL   | H1047L   | 489          | 27          |
| PIK3CA | HLA-C*06:02 | 9        | ARHGGWTTKM  | H1047R   | 457          | 200         |
| PIK3CA | HLA-A*03:01 | 0        | KAISTRDPLSK | E542K    | 429          | 106         |
| PIK3CA | HLA-C*03:04 | 1        | YFMKQMNDAL  | H1047L   | 381          | 27          |
| PIK3CA | HLA-C*03:03 | 1        | YFMKQMNDAL  | H1047L   | 381          | 27          |
| PIK3CA | HLA-A*03:01 | 0        | STRDPLSEITK | E545K    | 321          | 182         |
| PIK3CA | HLA-C*07:01 | 9        | ARHGGWTTKM  | H1047R   | 249          | 200         |
| PIK3CA | HLA-A*02:01 | 2        | FMKQMNDAL   | H1047L   | 246          | 27          |
| PIK3CA | HLA-C*07:02 | 9        | ARHGGWTTKM  | H1047R   | 218          | 200         |
| PIK3CA | HLA-A*03:01 | 1        | AISTRDPLSK  | E542K    | 213          | 106         |
| PIK3CA | HLA-A*11:01 | 2        | ISTRDPLSK   | E542K    | 212          | 106         |
| PIK3CA | HLA-A*03:01 | 3        | STRDPLSK    | E542K    | 203          | 106         |
| PIK3CA | HLA-A*03:01 | 10       | KTQKVQMK    | E726K    | 161          | 21          |
| PIK3CA | HLA-A*11:01 | 9        | ALHGGWTTK   | H1047L   | 148          | 27          |
| PIK3CA | HLA-A*11:01 | 0        | KAISTRDPLSK | E542K    | 87           | 106         |
| PIK3CA | HLA-A*11:01 | 1        | AISTRDPLSK  | E542K    | 87           | 106         |
| PIK3CA | HLA-A*11:01 | 0        | STRDPLSEITK | E545K    | 81           | 182         |
| PIK3CA | HLA-A*11:01 | 3        | STRDPLSK    | E542K    | 66           | 106         |
| PIK3CA | HLA-A*03:01 | 9        | ALHGGWTTK   | H1047L   | 61           | 27          |
| PIK3CA | HLA-A*11:01 | 10       | KTQKVQMK    | E726K    | 60           | 21          |
| OPRD1  | HLA-C*03:04 | 2        | ASDAYPSAF   | C27F     | 402          | 25          |
| OPRD1  | HLA-C*03:03 | 2        | ASDAYPSAF   | C27F     | 402          | 25          |
| OPRD1  | HLA-A*01:01 | 2        | ASDAYPSAF   | C27F     | 389          | 25          |
| OPRD1  | HLA-C*03:04 | 1        | NASDAYPSAF  | C27F     | 77           | 25          |
| OPRD1  | HLA-C*03:03 | 1        | NASDAYPSAF  | C27F     | 77           | 25          |

|         |             |    |             |        |     |     |
|---------|-------------|----|-------------|--------|-----|-----|
| MUC4    | HLA-A*02:01 | 9  | GQATPLPV    | H4205Q | 228 | 44  |
| KRAS    | HLA-C*03:04 | 8  | GAAGVGKSAL  | G12A   | 217 | 22  |
| KRAS    | HLA-C*03:03 | 8  | GAAGVGKSAL  | G12A   | 217 | 22  |
| KRAS    | HLA-A*02:01 | 3  | KLVVVGADGV  | G12D   | 214 | 322 |
| KRAS    | HLA-C*03:04 | 8  | GAVGVGKSAL  | G12V   | 172 | 239 |
| KRAS    | HLA-C*03:03 | 8  | GAVGVGKSAL  | G12V   | 172 | 239 |
| KRAS    | HLA-A*02:01 | 3  | KLVVVGAV    | G12V   | 163 | 239 |
| KRAS    | HLA-A*02:01 | 3  | KLVVVGAVGV  | G12V   | 112 | 239 |
| KRAS    | HLA-A*02:01 | 3  | KLVVVGACGV  | G12C   | 98  | 26  |
| KRAS    | HLA-B*40:01 | 0  | TEYKLVVVGAV | G12V   | 90  | 239 |
| KRAS    | HLA-A*02:01 | 3  | KLVVVGAAGV  | G12A   | 82  | 22  |
| KRAS    | HLA-B*07:02 | 8  | GARGVGKSAL  | G12R   | 79  | 102 |
| GNAS    | HLA-B*35:01 | 10 | HVLTSGIF    | R844H  | 199 | 20  |
| FRG1    | HLA-C*03:04 | 10 | QVFQNGKMALL | P140Q  | 477 | 22  |
| FRG1    | HLA-C*03:03 | 10 | QVFQNGKMALL | P140Q  | 477 | 22  |
| FRG1    | HLA-C*03:04 | 10 | QVFQNGKMAL  | P140Q  | 180 | 22  |
| FRG1    | HLA-C*03:03 | 10 | QVFQNGKMAL  | P140Q  | 180 | 22  |
| FAM194B | HLA-A*03:01 | 10 | HLGKEGYLEK  | Y139H  | 413 | 27  |
| FAM194B | HLA-A*11:01 | 10 | HLGKEGYLEK  | Y139H  | 262 | 27  |
| CTNNB1  | HLA-B*35:01 | 3  | GATTTAPF    | S45F   | 407 | 20  |
| CTNNB1  | HLA-B*35:01 | 2  | SGATTTAPF   | S45F   | 393 | 20  |
| CTNNB1  | HLA-C*07:02 | 2  | SYLDSGIHF   | S37F   | 322 | 23  |
| CTNNB1  | HLA-B*35:01 | 1  | HSGATTTAPF  | S45F   | 99  | 20  |
| CTNNB1  | HLA-A*24:02 | 2  | SYLDSGIHF   | S37F   | 82  | 23  |
| CHEK2   | HLA-B*40:01 | 9  | SEILGETSLM  | K416E  | 49  | 35  |
| CHEK2   | HLA-B*40:01 | 9  | SEILGETSL   | K416E  | 10  | 35  |

**Supplementary Table S4.** The distribution of neoantigens across 20 tumor types

| Tumor type     | #Neoantigens | #Donors | #Average<br>Neoantigens |
|----------------|--------------|---------|-------------------------|
| Uterus         | 176130       | 246     | 715.98                  |
| Skin           | 410717       | 584     | 703.28                  |
| Stomach        | 116429       | 298     | 390.70                  |
| Lung           | 74604        | 224     | 333.05                  |
| Colorectal     | 140713       | 443     | 317.64                  |
| Bladder        | 48348        | 233     | 207.50                  |
| Cervix         | 38025        | 194     | 196.01                  |
| Esophagus      | 38894        | 347     | 112.09                  |
| Gall_Bladder   | 23924        | 239     | 100.10                  |
| Liver          | 96283        | 966     | 99.67                   |
| Ovary          | 14736        | 181     | 81.41                   |
| Breast         | 76006        | 1072    | 70.90                   |
| Head_and_neck  | 36381        | 521     | 69.83                   |
| Kidney         | 37620        | 668     | 56.32                   |
| Pancreas       | 35736        | 685     | 52.17                   |
| Prostate       | 18106        | 499     | 36.28                   |
| Brain          | 28213        | 797     | 35.40                   |
| Blood          | 10166        | 686     | 14.82                   |
| Bone           | 2084         | 164     | 12.71                   |
| Nervous_System | 258          | 108     | 2.39                    |

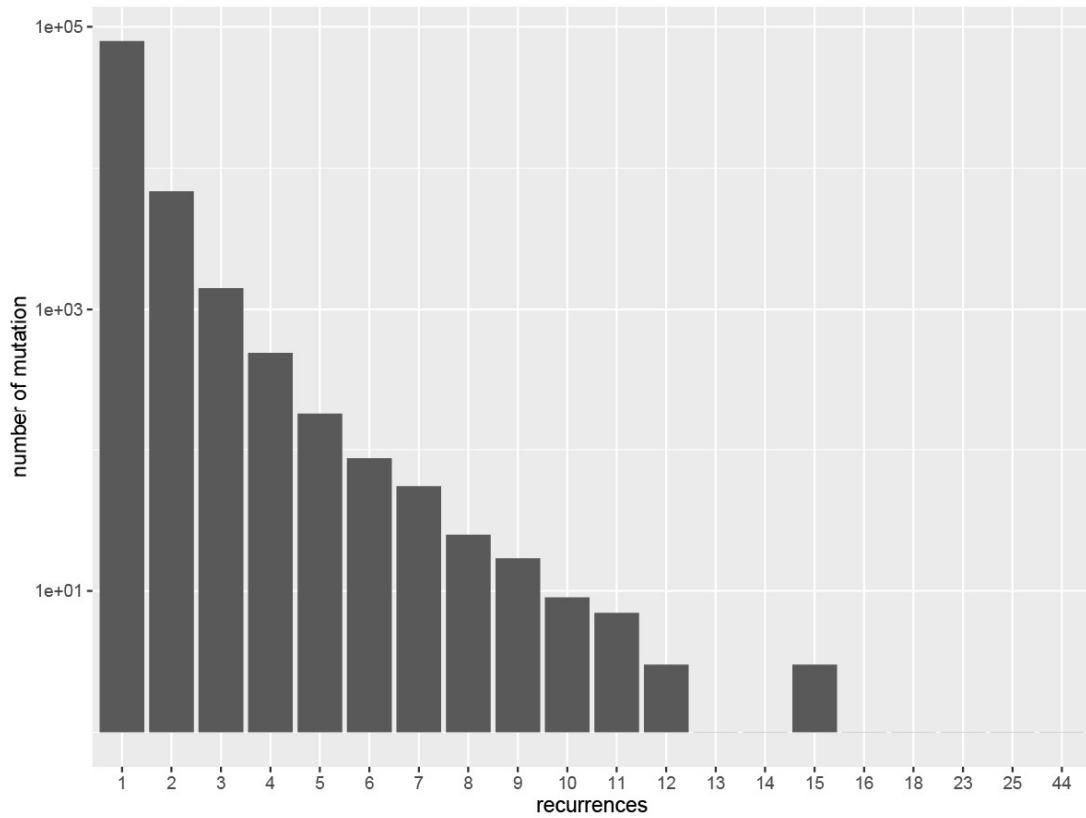

**Supplementary Figure S1.** The distribution of mutations with the same recurrences in membrane proteins. A majority of these extracellular mutations (89.6%, 79,198 out of 88,354) occur only once in the 9,155 donors.

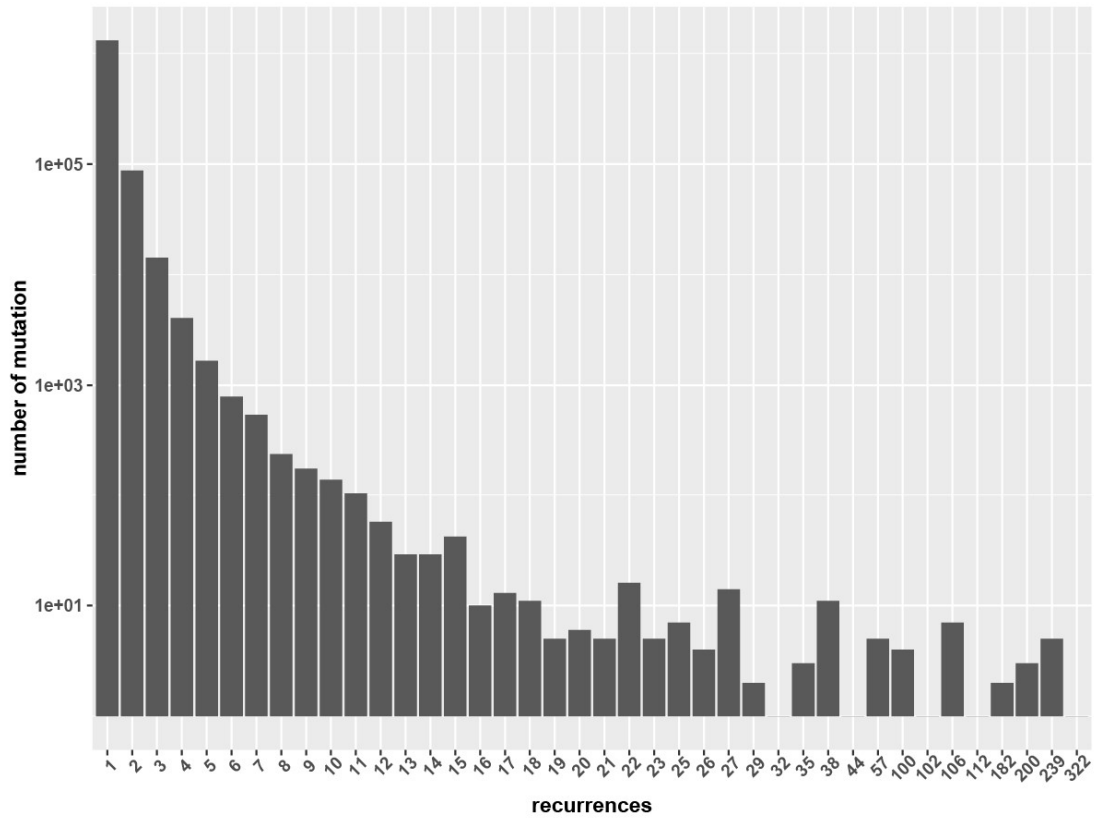

**Supplementary Figure S2.** The distribution of mutations with the same recurrences in MHC prediction results. 1311238 mutations only occur in one sample.
